# Supplementary material for: Reforming Sustainability-Linked Bonds by Strengthening Investor Trust
Source: Preprints.org preprint supplement (doi:10.20944/preprints202405.1454.v1), 2024-05-22
Supplement: Supplementary file 3 [file supplementary]

## Sheet: Fig 1
	SEMI-ANNUAL ISSUANCE OF THE LABELLED BONDS MARKET
										(nos in billions)
		2019		2020		2021		2022		2023
		H1	H2	H1	H2	H1	H2	H1	H2	H1
	Green Bonds	135	145	115	225	305	360	290	260	320
	Social Bonds	10	9	55	120	155	70	70	75	78
	Sustainability Bonds	45	40	70	110	130	102	100	70	73
	Sustainability-Linked Bonds		8	0	10	50	75	60	30	33
	Source: Authors, adapted from LSEG 2023

## Sheet: Fig 2
	SLBS PARTICULARLY POPULAR IN HARD-TO-ABATE SECTORS
		SLBs	Green bonds
	Aluminium	0.87	0.13
	Airlines	0.58	0.42
	Cement	0.54	0.46
	Oil & Gas	0.48	0.52
	Paper	0.39	0.61
	Oil & Gas Distribution	0.385	0.615
	Diversified Mining	0.38	0.62
	Chemicals	0.34	0.66
	Steel	0.34	0.66
	Shipping	0.28	0.72
	Coal mining	0.17	0.83
	Electricity utilities	0.12	0.88
	Autos	0	1
	Source: Authors, adapted from LSEG 2023

## Sheet: Fig 3 & 4
	Fig 3
	Number of KPIs used in SLBs
	Options	%
	One	0.53
	Two	0.35
	Three	0.12
	Source: AIFC adapted by the authors
	Fig 4
	Most commonly used KPIs in SLBs
	Options	%
	GHG emissions	0.54
	Others	0.13
	Renewable Energy	0.08
	Energy Efficiency	0.06
	Undisclosed	0.06
	Water	0.03
	Waste	0.05
	ESG Score	0.05
	Source: Climate Bonds Initiative (2023b) adapted by authors

## Sheet: Fig 5 -21 (excl Fig 11)
	Figure 5
	“What are your general impressions about the current state and adoption of Sustainability-Linked Bonds?”
	Options	%	# of respondents
	SLBS are at the nascent stage but hold great potential for sustainable development	0.23	3
	The market is growing, but the effectiveness of these bonds in driving real change is yet to be seen	0.39	5
	They are gaining traction, but there's is still a lack of awarenessand understanding among many investors	0.38	5
								Source: Authors
	Multiple Choice
	Figure 6
	Where do you see the market for Sustainability-Linked Bonds in the next five to 10 years?
	Options	%	# of respondents
	Becoming more integrated with mainstream finance and playing a key role in national sustainable development goals	0.357143	5
	Growing significantly as awareness and demand for sustainable investments increase	0.428571	6
	SLBs will continue at an inflection point if concerns about ambitious and incentives to achieve sustainability targets are not addressed	0.428571	6
		Total no. of respondents	14
								Source: Authors
	Multiple choice - (no option to select, essay)
	Figure 7
	“What do you perceive as the main factors that inhibit SLB market growth?”
	Options	%	# of respondents
	Calibration of SPTs (not standard and science based, difficulty to assess impact).	0.333333	4
	Unfavorable cost/benefit for issuer (No greenium for issuer, lack of accepted valuation methodology, extra cost of structuring).	0.333333	4
	Selection of KPIs (lack of materiality and ambition).	0.25	3
	Penalty too mild.	0.166667	2
	Market is too recent.	0.0833333	1
	Negative headlines.	0.0833333	1
		Total no. of respondents	12
							Source: Authors
	Figure 8
	“How effective are the current SPTs and KPIs in driving social and environmental impact?”
	Options	%	# of respondents
	KPIs and SPTs are somewhat effective, but there's room for more rigorous and impactful KPIs.	0.64	9
	KPIs and SPTs lack the standardization needed to drive significant change.	0.29	4
	SPTs need higher incentives to be achieved.	0.07	1
								Source: Authors
	Figure 9
	“Concerning SPTs and KPIs, what areas do you think require improvement in the design of SLBs to enhance their impact?”
	Options	%	# of respondents
	The incorporation of more diverse and sector-specific sustainability metrics could be beneficial.	0.36	5
	Improvement is needed in transparency and accountability mechanisms.	0.28	4
	There needs to be better alignment with national sustainability goals.	0.29	4
	Simplicity will help drive adoption.	0.07	1
									Source: Authors
	Multiple Choice
	Figure 10
	“How can SLBs be designed to better address sustainability-related risks?”
	Options	%	# of respondents
	Through regular, detailed reporting on sustainability performance and risks.	0.642857	9
	By engaging with unbiased third-party auditors to mediate between issuers and investors.	0.428571	6
	By including comprehensive risk assessments related to sustainability in their documentation.	0.214286	3
		Total no. of respondents	14
								Source: Authors
	Multiple Choice
	Figure 12
	“How do you think stakeholder could be engaged in the structuring of SLBs?”
	Options	%	# of respondents
	By creating platforms for continuous dialogue between investors and issuers.	0.615385	8
	By conducting regular stakeholder meetings and incorporating their feedback into SLB design.	0.230769	3
	By creating standards for clear and robust reporting, providing investors with more reliable information.	0.0769231	1
	Pre-issuance consultation with stakeholders to define materiality and potential impact metrics.	0.0769231	1
		Total no. of respondents	13
								Source: Authors
	Figure 13
	“Should the mechanism for adjusting interest rates in response to missed or reached SPTs be a step-up, step-down, or another mechanism?”
	Options	%	# of respondents
	Step-up.	0.46	5
	Step-down.	0.27	3
	Alternative mechanisms might offer more tailored incentives or penalties.	0.18	2
	Both step-up and step-down.	0.09	1
								Source: Authors
	Figure 14
	“What are the most relevant criticisms of using a uniform 25bps coupon step-up across different situations, and why?”
	Options	%	# of respondents
	The uniform approach fails to account for the varying impact of SPTs on large vs. small companies.	0.38	5
	A flat rate is insensitive to the varying challenges faced by high-grade and high-yield companies, especially during periods of fluctuating Federal rates.	0.31	4
	It does not consider the differing abilities of companies with large/small cash flows to absorb such penalties.	0.23	3
	The uniform approach fails to account for the wide range of KPIs.	0.08	1
								Source: Authors
	Figure 15
	“What should be the basis for defining a just financial reward/penalty in SLBs?”
	Options	%	# of respondents
	Company-aligned based on coupon: Tailoring the reward/penalty relative to the company’s cost of debt, neutralizing effects of changing Federal rates.	0.46	6
	Percentage of total cost: A penalty that accounts for a company’s overall financial scale, ensuring equity between large and small issuers.	0.46	6
	Intervention-aligned: Estimating the true benefit/cost of the SPT, irrespective of the company’s size or sector.	0.08	1
								Source: Authors
	Figure 16
	“How should the step-up penalties in SLBs be applied?”
	Options	%	# of respondents
	Providing additional returns to investors, directly linking their investment returns to the issuer's sustainability performance.	0.73	8
	Donating to charity or philanthropic causes, aligning financial penalties with broader societal benefits.	0.27	3
								Source: Authors
	Figure 17
	“How can one ensure that issuers do not repurchase bonds early to conceal a miss in SPTs, given the higher likelihood of repurchase in SLBs compared to traditional bonds?”
	Options	%	# of respondents
	Restrictive covenants or penalties for early repurchase related to SPT misses could be implemented.	0.67	8
	Introducing transparency and reporting requirements could deter issuers from using early repurchase as a tactic to hide SPT misses.	0.33	4
								Source: Authors
	Multiple Choice
	Figure 18
	“How can transparency and reporting practices be enhanced to boost the credibility of SLBs?"
	Options	%	# of respondents
	Through mandatory, standardized reporting on sustainability metrics.	0.642857	9
	By having independent third-party verification of sustainability claims.	0.5	7
	Regular updates and disclosures about progress towards sustainability targets.	0.428571	6
		Total no. of respondents	14
								Source: Authors
	Figure 19
	“What kind of incentives could be introduced to encourage more issuers and investors to participate in the SLB market?”
		%	# of respondents
	Tax incentives for issuers and investors focusing on SLBs.	0.54	8
	Recognition and rewards for achieving outstanding sustainability performance.	0.2	3
	Financial subsidies or grants for issuers of SLBs, in order to increase issue size.	0.13	2
	No need for additional incentives.	0.13	2
								Source: Authors
	Multiple Choice
	Figure 20
	“What role do you see for regulatory bodies in shaping the future of SLBs?”
		%	# of respondents
	They can facilitate market growth through supportive policies and incentives.	0.5	7
	They should establish clearer guidelines and standards for SLBs.	0.428571	6
	Regulatory bodies could play a role in monitoring and enforcing compliance.	0.357143	5
	There is no role for regulatory bodies.	0.0714286	1
		Total no. of respondents	14
								Source: Authors
	Multiple Choice
	Figure 21
	“What are the key factors that, in your opinion, would increase investor confidence in SLBs?”
	Options	%	# of respondents
	Evidence of tangible environmental and social impacts.	0.785714	11
	Greater transparency and more consistent reporting standards.	0.642857	9
	Stronger regulatory frameworks and government support.	0.428571	6
	Increase of issue size.	0.0714286	1
	Expert advisory services to help issuers structure and market large-scale SLBs.	0.0714286	1
		Total no. of respondents	14
								Source: Authors

## Sheet: References
	List of references:
	S.No	Source
	1	Bloomberg, 2022. ESG May Surpass $41 Trillion Assets in 2022, But Not Without Challenges, Finds Bloomberg Intelligence. Retrieved from https://www.bloomberg.com/company/press/esg-may-surpass-41-trillion-assets-in-2022-but-not-without-challenges-finds-bloomberg-intelligence/
	2	Bosmans, P.; de Mariz, F., 2023. The Blue Bond Market: A Catalyst for Ocean and Water Financing. J. Risk Financial Manag. 2023, 16, 184. https://doi.org/10.3390/jrfm16030184
	3	Burke, J. February, 2023. Sustainability Linked Bonds: Overview and Disclosure Guidelines. ESGReportingHub. Retrieved from https://www.esgreportinghub.org/article/disclosures-for-sustainability-linked-bonds
	4	Cavosoglu, N., Oldani, B., Paris, S., Pamponet Moura, A., & Carillo Sosa, D., n.d.. Three Ways to Protect the Sustainability-Linked Bond Market. IDB Invest. Retrieved from https://idbinvest.org/en/blog/investment-funds/three-ways-protect-sustainability-linked-bond-market
	5	Chesné, L. August, 2022. ICMA’s newly released KPI registry to discipline SLB issuances. Natixis. Retrieved from https://gsh.cib.natixis.com/our-center-of-expertise/articles/icma-s-newly-released-kpi-registry-to-discipline-slb-issuances
	6	Climate Bonds Initiative, 2022. Sustainable Debt Global State of the market 2022. Retrieved from https://www.climatebonds.net/files/reports/cbi_sotm_2022_03e.pdf
	7	Climate Bonds Initiative, 2023a. 101 Sustainable Finance Policies for 1.5 °C. Retrieved from https://www.climatebonds.net/files/reports/cbi_101_policyideas.pdf
	8	Climate Bonds Initiative, 2023b. Sustainable Debt Market Summary H1 2023. Retrieved from https://www.climatebonds.net/files/reports/cbi_susdebtsum_h12023_01b.pdf
	9	de Mariz, F., 2022a. The Promise of Sustainable Finance: Lessons From Brazil. Georgetown Journal of International Affairs 23(2), 185-190. https://doi.org/10.1353/gia.2022.0030
	10	de Mariz, F., 2022b. Finance with a Purpose: FinTech, Development and Financial Inclusion in the Global Economy, World Scientific Books, World Scientific Publishing. https://doi.org/10.1142/q0359
	11	de Mariz, F., 2020. Fintech for Impact: How Can Financial Innovation Advance Inclusion? Included in Global Handbook of Impact Investing: Solving Global Problems Via Smarter Capital Markets Towards A More Sustainable Society, Wiley, Ed. Elsa De Morais Sarmento, R. Paul Herman, ISBN: 978-1-119-69064-1, Available at SSRN: https://ssrn.com/abstract=3715785
	12	de Mariz, F., Savoia, J. R. F., 2018. Chapter 13: Financial innovation with a social purpose: the growth of Social Impact Bonds. In Research Handbook of Investing in the Triple Bottom Line, Cheltenham, UK: Edward Elgar Publishing. https://doi.org/10.4337/9781788110006.00021
	13	Deschryver, P.; de Mariz, F., 2020. What Future for the Green Bond Market? How Can Policymakers, Companies, and Investors Unlock the Potential of the Green Bond Market? J. Risk Financial Manag. 2020, 13, 61. https://doi.org/10.3390/jrfm13030061
	14	Enel, 2023. A new framework for even more sustainable finance. Enel. Retrieved from https://www.enel.com/company/stories/articles/2023/02/new-framework-sustainable-finance-group
	15	Environmental Finance, n.d.. Sustainability-linked bond of the year: Suzano. Environmental Finance's Bond Awards 2021. Environmental Finance. Retrieved from https://www.environmental-finance.com/content/awards/winners/sustainability-linked-bond-of-the-year-suzano.html
	16	Fitch, 2022. Sustainability-Linked Bond Progress Report. Fitch, 1-7. Retrieved from https://www.sustainablefitch.com/fund-asset-managers/sustainability-linked-bond-progress-report-22-09-2022
	17	Flammer, C., 2021. Corporate Green Bonds. Journal of Financial Economics Volume 142, Issue 2. Retrieved from https://www.sciencedirect.com/science/article/pii/S0304405X21000337?casa_token=9azwFVXJnc4AAAAA:A_gsDRcJXgcRbmeiZ57ovP2zk_XeiyTuDL2ls8t_fL-G_OG4dAB-8u_tXVEFBnNptJmR0OOqAWc
	18	Glisovic, J., Gonzalez, H., Saltuk, Y., de Mariz, F., 2012. Volume Growth and Valuation Contraction, Global Microfinance Equity Valuation Survey 2012. http://dx.doi.org/10.2139/ssrn.2625221
	19	ICMA, 2023a. Sustainability-Linked Bond Principles Voluntary Process Guidelines. ICMA, 2-9. Retrieved from https://www.icmagroup.org/assets/documents/Sustainable-finance/2023-updates/Sustainability-Linked-Bond-Principles-June-2023-220623.pdf
	20	ICMA, 2023b. Market integrity and greenwashing risks in sustainable finance. ICMA. Retrieved from https://www.icmagroup.org/assets/documents/Sustainable-finance/Market-integrity-and-greenwashing-risks-in-sustainable-finance-October-2023.pdf
	21	ICMA, 2022. Sustainability-Linked Bond Principles Related Questions. ICMA. Retrieved from https://www.icmagroup.org/assets/documents/Sustainable-finance/2022-updates/SLB-QA-CLEAN-and-FINAL-for-publication-2022-06-24-280622.pdf
	22	ICMA, 2021. Sustainability-Linked Bond Principles Related questions. ICMA. Retrieved from https://www.icmagroup.org/assets/documents/Sustainable-finance/Sustainability-Linked-Bond-Principles-Related-questions-February-2021-170221v3.pdf
	23	IFC, 2023. Making Sustainability-Linked Bonds More Impactful. IFC. Retrieved from https://www.ifc.org/en/insights-reports/2023/making-sustainability-linked-bonds-more-impactful
	24	ISS Insights. February, 2022. Sustainability-linked Bonds and Loans: Avoiding Greenwash. ISS Insights. Retrieved from https://insights.issgovernance.com/posts/sustainability-linked-bonds-and-loans-avoiding-greenwash/
	25	Kölbel, J. F., & Lambillon, A.-P. January 31, 2023. Who pays for sustainability? An analysis of Sustainability Linked Bonds. Swiss Finance Series Research Paper series N°23-07.
	26	Bruegel, 2023. The potential of sovereign sustainability-linked bonds in the drive for net-zero. Bruegel. Retrieved from https://www.bruegel.org/policy-brief/potential-sovereign-sustainability-linked-bonds-drive-net-zero
	27	LSEG (London Stock Exchange Group), August, 2023. Meng, A. Sustainability-linked bonds: a nascent market that is gaining traction. Retrieved from https://www.lseg.com/en/insights/ftse-russell/sustainability-linked-bonds-nascent-market-gaining-traction
	28	Mao, Y., 2023. Decoding Corporate Green Bonds: What Issuers Do With the Money and Their Real Impact. SSRN. Retrieved from https://ssrn.com/abstract=4599395 or http://dx.doi.org/10.2139/ssrn.4599395
	29	Mielnik, S., & Erlandsson, U., 2022. An option pricing approach for sustainability-linked bonds. Anthropocene Fixed Income Institute, 14-19. Retrieved from https://img1.wsimg.com/blobby/go/946d6aac-e6cc-430a-8898-520cf90f5d3e/AFII%20SLB%20option%20pricing%20approach.pdf
	30	Pianese, B. October, 2023. Latam innovates on sustainability, but impact assessment is key. The Banker. Retrieved from https://www.thebanker.com/Latam-innovates-on-sustainability-but-impact-assessment-is-key-1696318214
	31	Redondo Alamillos, R.; de Mariz, F., 2022. How Can European Regulation on ESG Impact Business Globally? J. Risk Financial Manag. 2022, 15, 291. https://doi.org/10.3390/jrfm15070291
	32	Hermes Investment, 2022. Do Sustainability-linked bonds have a Step-up problem? Hermes Investment, 2-8. Retrieved from https://www.hermes-investment.com/uploads/2022/04/15b2244e2bdb60da605fa8d00413bd1e/fhi_credit_take-note_sustainability-linked-bonds_march-2022-v2.pdf
	33	Ritchi, G., & Tugwell, P., 2022. Global ESG-Linked Bond Market Faces Its First Set of Penalties. Bloomberg. Retrieved from https://www.bloomberg.com/news/articles/2022-11-17/global-esg-linked-bond-market-faces-its-first-set-of-penalties
	34	Segal, M., 2023. Sustainability-Linked Bonds Need to Address Credibility Issues to Resume Growth: S&P. S&P Global. Retrieved from https://www.esgtoday.com/sustainability-linked-bonds-need-to-address-credibility-issues-to-resume-growth-sp/
	35	S&P Global, 2021a. Environmental, Social, And Governance: How Sustainability-Linked Debt Has Become A New Asset Class. S&P Global. Retrieved from https://www.spglobal.com/ratings/en/research/articles/210428-how-sustainability-linked-debt-has-become-a-new-asset-class-11930349
	36	S&P Global, 2021b. The Fear Of Greenwashing May Be Greater Than The Reality Across The Global Financial Markets. S&P Global. Retrieved from https://www.spglobal.com/ratings/en/research/articles/210823-the-fear-of-greenwashing-may-be-greater-than-the-reality-across-the-global-financial-markets-12074863
	37	S&P Global, 2023. Higher costs loom for sustainability-linked bonds issuers as deadlines approach. S&P Global. Retrieved December 4, 2023, from https://www.spglobal.com/marketintelligence/en/news-insights/latest-news-headlines/cpil-2709806-article_news_title-textbox-higher-costs-loom-for-sustainability-linked-bond-issuers-as-deadlines-appro-75516523.
	38	Sustainalytics, 2023. Sustainability-Linked Financial Instruments: Creating Targets and Measuring Your Company's Performance. Sustainalytics. Retrieved from https://www.sustainalytics.com/esg-research/resource/corporate-esg-blog/sustainability-linked-financial-instruments-creating-targets-and-measuring-your-company's-performance
	39	The World Bank Group, 2023. Green, Social, and Sustainability (GSS) Bonds Market Update - January 2023. The World Bank. Retrieved from https://thedocs.worldbank.org/en/doc/98c3baab0ea4fc3da4de0e528a5c0bed-0340012023/original/GSS-Quarterly-Newsletter-Issue-No-2.pdf
	40	The World Bank Group, 2021. Striking the Right Note: Key Performance Indicators for Sovereign Sustainability-Linked Bonds. World Bank Group, 7-61. Retrieved from https://documents1.worldbank.org/curated/en/935681641463424672/pdf/Striking-the-Right-Note-Key-Performance-Indicators-for-Sovereign-Sustainability-Linked-Bonds.pdf
	41	United Nations Global Compact, (n.d.). Sustainable Finance: Corporate finance and investments as a catalyst for growth and social impact. Retrieved from https://unglobalcompact.org/sdgs/sustainablefinance
	42	Vulturius, G., Maltais, A., & Forsbacka, K., 2022. Sustainability-linked bonds – their potential to promote issuers’ transition to net-zero emissions and future research directions. Journal of Sustainable Finance & Investment. 14:1, 116-127, DOI: 10.1080/20430795.2022.204094
	43	World Economic Forum, 2022. What are sustainability linked bonds and how can they support the net-zero transition. World Economic Forum. Retrieved from https://www.weforum.org/agenda/2022/11/cop27-sustainability-linked-bonds-net-zero-transition/.
